# Supplementary material
Source: PubMed Central journal article supplement (PMC5370419)
Supplement: JB.00811-16_zjb999094363s1.pdf [file JB.00811-16_zjb999094363s1.pdf]

## 1 SUPPLEMENTARY MATERIAL

### 2 Primers

|    |                   |                                     |
|----|-------------------|-------------------------------------|
| 3  | ftsIF1 NdeI       | CAA CATATG TTGTTCTCGCGCGCCGGGCAGG   |
| 4  | ftsIR1 EcoRI      | CAA GAATTC GGGACGGTTGAACAGGTCGGACAG |
| 5  | ftsIdelF1 SpeI    | CAA ACTAGTACCTGGCCGAGGTGATCGAGC     |
| 6  | ftsIdelR1 HindIII | CAA AAGCTTCCGGGACCCAGGTTTCGAGAGG    |
| 7  | ftsIdelF2 HindIII | CAA AAGCTTTTCGCCAACTCGCCCAAGAACG    |
| 8  | ftsIdelR2 EcoRI   | CAAGAATTCCGCCGAACACCGCGATCAGC       |
| 9  | ftsIF3 SacI       | CAAGAGCTCGCATGAGCCTCTCGAACCTGGGTCC  |
| 10 | ftsNF1 NdeI       | CAACATATGGATGGCGTGCGCGGTCCCAAC      |
| 11 | ftsNR1 EcoRI      | CAAGAATTCCGGAAGGCGCGCCCATCAGAAGG    |
| 12 | delftsNF1 EcoRI   | CAAGAATTCCAACAACCATGACGTTCGACGAC    |
| 13 | delftsNR1 BamHI   | CAAGGATCCGGACATCTCAGCTAGGCTCC       |
| 14 | delftsNF2 BamHI   | CAAGGATCCTTCGTAAAGTGAGCCTTCTGATGG   |
| 15 | delftsNR2 HindIII | CAA AAGCTTGATCTTCTTGATCGCCTTCTTCG   |
| 16 | ftsNF2 NdeI       | CAACATATGTCCGATCCGCACCGCGGGGCCTATAC |
| 17 | ftsNF1 SacI       | CAAGAGCTCCGTCCGATCCGCACCGCGGGGCC    |
| 18 | ftsNR1 NheI       | CAAGCTAGCGGCTCACTTACGAAGCAGGATTTGC  |
| 19 | ftsWF2 SacI       | CAA GAGCTCCGGCCTCCAACGCGACCCACG     |
| 20 | ftsWR2 NheI       | CAAGCTAGCTTCCCCCGGCGGCGACAACAGC     |
| 21 | dipMmChF1 NdeI    | CAACATATGAGGCAGTTGTGGACGCAAG        |
| 22 | dipMmChR1 SacI    | CAAGAGCTCCGCGGGGCAGCACCAGCGCCGGATC  |
| 23 | murGF1 SacI       | CAAGAGCTCGGTTGGCAATCCGGTTCGTCC      |
| 24 | murGR1 EcoRI      | CAAGAATTCCTGCGCGCCGTCTTCTCCACCAG    |
| 25 | mreBF1 NdeI       | CAACATATGTTCTCTTCCCTTTTCGGCGTGATC   |
| 26 | ftsQR1 EcoRI      | CAAGAATTCTTGCCACCTCAGCCCATCACGTAC   |
| 27 | ftsQF2 NdeI       | CAACATATGGTTATGCTCGCGACCGGCCATC     |
| 28 | delftsLF1 SpeI    | CAA ACTAGTTTGGGTTTGGCGGGGTTTAAG     |
| 29 | delftsLR1 EcoRV   | CAAGATATCCCGGACCCGGCGATTGAAGAC      |
| 30 | delftsLF2 EcoRV   | CAAGATATCGTCCAGGGGGCGTTGCGATGAG     |

31 delftsLR2 SpeI CAAACTAGTGGGACGGTTGAACAGGTCCGGACAG  
 32 ftsLF1 NdeI CAACATATGACGGCGGCTGGCGTCTTCAATCG  
 33 ftsLR1 EcoRI CAAGAATTCGGACCCAGGTTTCGAGAGGCTCATCG  
 34 ftsbR1 EcoRI CAAGAATTCAGCGACAGATCAGCGCGAACG  
 35 ftsLF2 NdeI CAACATATGAAGACCTTCGCCGGTTCGCGAG  
 36 ftsBF2 NdeI CAACATATGCACGCTCTGACGGGTGATCG  
 37 mreBswF1 HindIII CAAAAGCTTGATGCTTGGCGGGTCCCATCG  
 38 mreBswR1 CAAGCATGCGCTCGAGCCAGAACCGGGCGCGCGG  
 39 SphIXhoI GCGGTGCCGATTC  
 40 mreBswF2 CAAGCATGCTCTGGCGCGCCGGCCGACGGCG  
 41 SphIAscI AAGGTCTGTCTG  
 42 mrebr2 EcoRI GAAGAATTCTCAAGGCCAGGCCCGTCCAG  
 43 mCherryF2 XhoI CAACTCGAGCATGGTCTCCAAGGGCGAGGAGGATAAC  
 44 mCherryR2 AscI CAAGGCGCGCCCGACTTGTACAGCTCGTCCATGC  
 45 tmRNAF1 EcoRI CAAGAATTCGGCGGCCAACGATAACTTCGCTGAAGAG  
 46 tmRNAR1 XbaI CAATCTAGACTTAAGAGGCGAATTCACCTGC  
 47 CC3721 F3 NdeI CAACATATGCGGTCAAAAACAGAACAAGGTTC  
 48 3721mchRI EcoRI CAAGAATTCCGTTTTCGACACTGAACGGCCGGATC  
 49 CC3721 F3 NdeI CAACATATGCGGTCAAAAACAGAACAAGGTTC  
 50 CC3721 F1 HindIII CAAAAGCTTCGGGCCAGCATCTGGTTCGAGG  
 51 CC3721 R1 BamHI CAAGGATCCCGTCAAACCCATTCGAGACGAACC  
 52 CC3721 F2 BamHI CAAGGATCCGGATCCGGCCGTTCAGTGTCG  
 53 CC3721 R2 EcoRI CAAGAATTCCCTACGATCCATCAGGGGCCAGC  
 54 3721F6 NdeI CAACATATGCAGGGTCCCCGCGTCACGCCCTCC  
 55 GGCCTGGAG  
 56 3721R6 EcoRI CAAGAATTCCCGATCCCAAGCCGACCTATCG  
 57 3721mchF1 HindIII CAAAAGCTTGAGGTGCCGCGCTACGTTTCG  
 58

59 **Plasmid construction**

60 pNPT $\Delta$ dipI $\Omega$

61 The PCR products obtained using CB15N chromosomal DNA as template and the  
62 primer pairs CC3721F1 HindIII/CC3721R1 BamHI and CC3721F2  
63 BamHI/CC3721R2 EcoRI were digested with BamHI and ligated. An aliquot of the  
64 ligase reaction mixture was used as template for a second PCR with the primers  
65 CC3721F1 HindIII and CC3721 R2 EcoRI. The PCR product was cloned in the  
66 HindIII/EcoRI sites of pNPTS138. The resulting plasmid was digested with BamHI  
67 and ligated with the 2 Kb BamHI fragment containing the  $\Omega^{\text{SpC}}$  from pBOR.

68

#### 69 pXdipI<sub>tm5</sub>

70 The PCR products obtained CB15N chromosomal DNA as template and the primer  
71 pairs tmRNAF1 EcoRI/ tmRNAR1 XbaI and CC3721 F3 NdeI/3721mchRI EcoRI  
72 were digested with EcoRI and ligated, this resulted in the addition of the following  
73 sequence after the last coding codon of *dipI*:  
74 AATTCGGCGGCCAACGATAACTTCGCTGAAGAGTTCGCCGTCGCTGCGTAAT  
75 GCGGTGCAGGTGAATTGCCTCTTAAGTCTAGA. After translation the following  
76 amino acids were added to the sequence of DipI: N S A A N D N F A E E F  
77 A V A A. An aliquot of the ligase reaction mixture was used as template for a  
78 second PCR with the primers CC3721 F3 NdeI and tmRNAR1 XbaI. The PCR  
79 product was cloned in pCR2.1TOPO the correct orientation of the fragment was then  
80 selected and the resultant plasmid was digested with NdeI and SacI. The 600 bp  
81 fragment was purified and cloned in pXTCYC-5 digested with the same restriction  
82 enzymes.

83

#### 84 pXdipI<sub>5</sub>

85 The PCR product obtained using CB15N chromosomal DNA as template and the  
86 primers 3721mchRI EcoRI and CC3721 F3 NdeI was digested with EcoRI and NdeI  
87 and cloned in the NdeI/EcoRI sites of pXTCYC-5. No additional amino acids were  
88 added to que sequence of DipI.

89

#### 90 pNPT $\Delta$ ftsN

91 The PCR products obtained using CB15N chromosomal DNA as template and the  
92 primer pairs delftsNF1 EcoRI / delftsNR1 BamHI and delftsNF2 BamHI / delftsNR2  
93 HindIII were digested with BamHI and ligated. An aliquot of the ligase reaction  
94 mixture was used as template for a second PCR with the primers delftsNF1 EcoRI  
95 and delftsNR2 HindIII. The PCR product was cloned in the HindIII/EcoRI sites of  
96 pNPTS138.

97

#### 98 pXftsN<sub>5</sub>

99 The PCR product obtained using CB15N chromosomal DNA as template and the  
100 primers ftsNF2 NdeI and ftsNR1 EcoRI was digested with EcoRI and NdeI and  
101 cloned in the NdeI/EcoRI sites of pXTCYC-5. No additional amino acids were added  
102 to the sequence of FtsN.

103

104

#### 105 pNPT $\Delta$ ftsI

106 The PCR products obtained using CB15N chromosomal DNA as template and the  
107 primer pairs ftsI<sub>del</sub>F1 SpeI / ftsI<sub>del</sub>R1 HindIII and ftsI<sub>del</sub>F2 HindIII/ftsI<sub>del</sub>R2 EcoRI  
108 were digested with HindIII and ligated. An aliquot of the ligase reaction mixture was  
109 used as template for a second PCR with primers ftsI<sub>del</sub>F1 SpeI and ftsI<sub>del</sub>R2 EcoRI.  
110 The PCR product was cloned in the SpeI/EcoRI sites of pNPTS138.

111

112

113 pXftsI5

114 The PCR product obtained using CB15N chromosomal DNA as template and the  
115 primers ftsI<sub>F</sub>4 NdeI and ftsI<sub>R</sub>1 EcoRI was digested with EcoRI and NdeI and cloned  
116 in the NdeI/EcoRI sites of pXTCYC-5. No additional amino acids were added to the  
117 sequence of FtsI.

118

119

120 pNPT $\Delta$ ftsL

121 The PCR products obtained using CB15N chromosomal DNA as template and the  
122 primer pairs delftsL<sub>F</sub>1 SpeI / delftsL<sub>R</sub>1 EcoRV and delftsL<sub>F</sub>2 EcoRV / delftsL<sub>R</sub>2 SpeI  
123 were digested with EcoRV and ligated. An aliquot of the ligase reaction mixture was  
124 used as template for a second PCR with delftsL<sub>F</sub>1 SpeI and delftsL<sub>R</sub>2 SpeI. The  
125 PCR product was cloned in the SpeI site of pNPTS138.

126

127 pXftsL5

128 The PCR product obtained using CB15N chromosomal DNA as template and the  
129 primers ftsL<sub>F</sub>1 NdeI and ftsL<sub>R</sub>1 EcoRI was digested with EcoRI and NdeI and cloned  
130 in the NdeI/EcoRI sites of pXTCYC-5. No additional amino acids were added to the  
131 sequence of FtsL.

132

133

134 pVdipMCHY2

135 The PCR product obtained using CB15N chromosomal DNA as template and the  
136 primers dipMmCHF1 NdeI and dipMmChR1 SacI was digested with NdeI and SacI  
137 and cloned in the NdeI/SacI sites of pVCHYC-2. This resulted in the fusion of DipM  
138 and mCherry by the following linker: RAPENSNVTRHRSAT.

139

140 pmurGCHY4

141 The PCR product obtained using CB15N chromosomal DNA as template and the  
142 primers murGF1 SacI and murGR1 EcoRI was digested with SacI and EcoRI and  
143 cloned in the SacI/EcoRI sites of pCHYC-4. This resulted in the fusion of MurG and  
144 mCherry by the following linker: RAPENSNVTRHRSAT.

145

146

147 pVCHYftsI4

148 The PCR product obtained using CB15N chromosomal DNA as template and the  
149 primers ftsI<sub>F</sub>3 SacI and ftsI<sub>R</sub>1 EcoRI was digested with SacI and EcoRI and cloned  
150 in the SacII/EcoRI sites of pVCHYN-4. This resulted in the fusion of mCherry and  
151 FtsI by the following linker: PAGALINMHGTLRSRAP.

152

153 pVCHYftsN6  
154 The PCR product obtained using CB15N chromosomal DNA as template and the  
155 primers ftsNF1 SacI and ftsNR1 NheI was digested with SacI and NheI and cloned  
156 in the SacI/NheI sites of pVCHYN-6. This resulted in the fusion of mCherry and FtsN  
157 by the following linker: PAGALINMHGTLRSRAP.  
158  
159 pXVENftsB2  
160 The PCR product obtained using CB15N chromosomal DNA as template and the  
161 primers ftsBF1 SacI and ftsBR1 NheI was digested with SacI and NheI and cloned  
162 in the SacI/NheI sites of pXVENN-2. This resulted in the fusion of Venus and FtsB  
163 by the following linker: PAGALINMHGTLRSRAP.  
164  
165 pXVENftsN2  
166 The PCR product obtained using CB15N chromosomal DNA as template and the  
167 primers ftsNF1 SacI and ftsNR1 NheI was digested with SacI and NheI and cloned  
168 in the SacI/NheI sites of pXVENN-2. This resulted in the fusion of Venus and FtsN  
169 by the following linker: PAGALINMHGTLRSRAP.  
170  
171 pXVENftsW2  
172 The PCR product obtained using CB15N chromosomal DNA as template and the  
173 primers ftsWF2 SacI and ftsWR2 NheI was digested with SacI and NheI and cloned  
174 in the SacI/NheI sites of pXVENN-2. This resulted in the fusion of Venus and FtsW  
175 by the following linker: PAGALINMHGTLRSRAP.  
176  
177 pVCHYftsW6  
178 The PCR product obtained using CB15N chromosomal DNA as template and the  
179 primers ftsWF2 SacI and ftsWR2 NheI in the SacI/NheI sites of pVCHYN-6. This  
180 resulted in the fusion of mCherry and FtsW by the following linker:  
181 PAGALINMHGTLRSRAP.  
182  
183 pdiplCHY4  
184 The PCR product obtained using CB15N chromosomal DNA as template and the  
185 primers 3721mchF1 HindIII and 3721mchRI EcoRI in the HindIII/EcoRI sites of  
186 pCHYC-4. This resulted in the fusion of Dipl and mCherry by the following linker:  
187 ENSNVTRHRSAT.  
188  
189 pVmreBswCHY4  
190 The mreBswmCherry construct was obtained essentially as previously  
191 described(1).The PCR products obtained with oligonucleotides pairs mreBswF1  
192 HindIII, mreBswR1 SphI XhoI and mreBswF2 SphI Ascl, mrebr2 EcoRI were  
193 digested with SphI and ligated. An aliquot of the ligase reaction was used as a  
194 template for a PCR reaction with oligonucleotides mreBswF1 HindIII and mrebr2  
195 EcoRI. The PCR product was purified, digested with HindIII and EcoRI and cloned

196 in pTZ19R. The resultant plasmid was digested with XhoI and AscI and ligated with  
197 the PCR product digested with the same enzymes that was obtained with primers  
198 mCherry F2 XhoI and mCherry R2 AscI and pCHYC-4 as template. The resulting  
199 plasmid was used as template in a PCR reaction with the oligonucleotides mreBF1  
200 NdeI and mrebr2 EcoRI, the PCR product was digested with NdeI and EcoRI and  
201 ligated with the 3.9 kb fragment obtained from a NdeI, EcoRI double digestion of  
202 pVCHYN-4.

203 pADdipl and pBDdipl

204 The PCR product obtained using CB15N chromosomal DNA as template and the  
205 primers 3721F6 NdeI and 3721R6 EcoRI was digested with EcoRI and NdeI and  
206 cloned in the NdeI/EcoRI sites of pBGKT7 and pGADT7.

207

208 pADftsI and pBDftsI

209 The PCR product obtained using CB15N chromosomal DNA as template and the  
210 primers ftsIF1 NdeI and ftsIR1 EcoRI was digested with EcoRI and NdeI and cloned  
211 in the NdeI/EcoRI sites of pBGKT7 and pGADT7.

212

213 pADftsN and pBDftsN

214 The PCR product obtained using CB15N chromosomal DNA as template and the  
215 primers ftsNF1 NdeI and ftsNR1 EcoRI was digested with EcoRI and NdeI and  
216 cloned in the NdeI/EcoRI sites of pBGKT7 and pGADT7.

217

218 pADftsB and pBDftsB

219 The PCR product obtained using CB15N chromosomal DNA as template and the  
220 primers ftsBF2 NdeI and ftsBR1 EcoRI was digested with EcoRI and NdeI and  
221 cloned in the NdeI/EcoRI sites of pBGKT7 and pGADT7.

222 pADftsL and pBDftsL

223 The PCR product obtained using CB15N chromosomal DNA as template and the  
224 primers ftsLF2 NdeI and ftsLR1 EcoRI was digested with EcoRI and NdeI and cloned  
225 in the NdeI/EcoRI sites of pBGKT7 and pGADT7.

226 pADftsQ and pBDftsQ

227 The PCR product obtained using CB15N chromosomal DNA as template and the  
228 primers ftsQF2 NdeI and ftsQR1 EcoRI was digested with EcoRI and NdeI and  
229 cloned in the NdeI/EcoRI sites of pBGKT7 and pGADT7.

230

231 **Strain construction**

232 SP2 strain was obtained by independently electroporating plasmids pNPT $\Delta$ dipI $\Omega$   
233 and pXdipI5 into CB15N cells, transformants that integrated the plasmids in the  
234 chromosome were selected by plating in PYE plates containing kanamycin or  
235 tetracycline respectively. The *xyIR::pXdipI5* allele was then transduced into the  
236 pNPT $\Delta$ dipI $\Omega$  transformant strain. Excision of the plasmid and replacement of the *dipI*  
237 allele by the  $\Omega^{\text{Spc}}$  cassette was selected by plating in PYE plates containing 3%  
238 sucrose, 0.2% xylose, spectinomycin and tetracycline followed by replica plating in  
239 PYE-Kan and PYE-Tc/Spc plates both containing 0.2% xylose.

240

241 SP3 strain was obtained by independently electroporating plasmids pNPT $\Delta$ dipI $\Omega$   
242 and pXdipI $\Delta$ m5 into CB15N cells, transformants that integrated the plasmids in the  
243 chromosome were selected by plating in PYE plates containing kanamycin or  
244 tetracycline respectively. The *xyIR::pXdipI $\Delta$ m5* allele was then transduced into the  
245 pNPT $\Delta$ dipI $\Omega$  transformant strain. Excision of the plasmid and replacement of the *dipI*  
246 allele by the  $\Omega^{\text{Spc}}$  cassette was selected by plating in PYE plates containing 3%  
247 sucrose, 0.2% xylose, spectinomycin and tetracycline followed by replica plating in  
248 PYE-Kan and PYE-Tc/Spc plates both containing 0.2% xylose.

249

250 SP4 strain was obtained by transducing the *vanR::pMT383* into SP3 strain

251

252 SP5 strain was obtained by independently electroporating plasmids pNPT $\Delta$ ftsI and  
253 pXftsI5 into CB15N cells, transformants that integrated the plasmids in the  
254 chromosome were selected by plating in PYE plates containing kanamycin or  
255 tetracycline respectively. The *xyIR::pXftsI5* allele was then transduced into the  
256 pNPT $\Delta$ ftsI transformant strain. Excision of the plasmid and replacement of the *dipI*  
257 allele by the  $\Omega^{\text{Spc}}$  cassette was selected by plating in PYE plates containing 3%  
258 sucrose, 0.2% xylose and tetracycline followed by replica plating in PYE-Kan and  
259 PYE-Tc plates both containing 0.2% xylose.

260

261 SP6 strain was obtained by transducing the *vanR::pVdipMCHYC2* allele into SP3  
262 strain

263

264 SP7 strain was obtained by transducing the *vanR::pVmreBswCHY4* allele into SP3  
265 strain

266

267 SP8 strain was obtained by transducing the *murG::pmurGCHY4* allele into SP3  
268 strain

269

270 SP9 strain was obtained by transducing the *vanR::pVmCHYftsI4* allele into SP3  
271 strain

272

273 SP10 strain was obtained by transducing the *vanR::pVmCHYftsW6* allele into SP3  
274 strain

275

276 SP12 strain was obtained by independently electroporating plasmids pNPT $\Delta$ ftsN  
277 and pXftsN5 into CB15N cells, transformants that integrated the plasmids in the

278 chromosome were selected by plating in PYE plates containing kanamycin or  
279 tetracycline respectively. The *xylR::pXftsN5* allele was then transduced into the  
280 pNPT $\Delta$ *ftsN* transformant strain. Excision of the plasmid and replacement of *ftsN*  
281 allele by the  $\Delta$ *ftsN* allele was selected by plating in PYE plates containing 3%  
282 sucrose, 0.2% xylose and tetracycline followed by replica plating in PYE-Kan and  
283 PYE-Tc plates both containing 0.2% xylose.

284

285 SP13 strain was obtained by independently electroporating plasmids pNPT $\Delta$ *ftsI* and  
286 pX*ftsI5* into CB15N cells, transformants that integrated the plasmids in the  
287 chromosome were selected by plating in PYE plates containing kanamycin or  
288 tetracycline respectively. The *xylR::pXftsI5* allele was then transduced into the  
289 pNPT $\Delta$ *ftsI* transformant strain. Excision of the plasmid and replacement of *ftsI* by  
290 the  $\Delta$  *ftsI* allele was selected by plating in PYE plates containing 3% sucrose, 0.2%  
291 xylose and tetracycline followed by replica plating in PYE-Kan and PYE-Tc plates  
292 both containing 0.2% xylose.

293

294 SP14 strain was obtained by independently electroporating plasmids pNPT $\Delta$ *ftsL*  
295 and pX*ftsL5* into CB15N cells, transformants that integrated the plasmids in the  
296 chromosome were selected by plating in PYE plates containing kanamycin or  
297 tetracycline respectively. The *xylR::pXftsL5* allele was then transduced into the  
298 pNPT $\Delta$ *ftsL* transformant strain. Excision of the plasmid and replacement of *ftsL* by  
299 the  $\Delta$  *ftsL* allele was selected by plating in PYE plates containing 3% sucrose, 0.2%  
300 xylose and tetracycline followed by replica plating in PYE-Kan and PYE-Tc plates  
301 both containing 0.2% xylose

302

303 SP15 strain was obtained by electroporating plasmid pdipICHY4 into CB15N cells.

304

305 SP16 strain was obtained by transducing the *dipI::pdipICHY4* allele into CJW3186  
306 strain

307

308 SP17 strain was obtained by transducing the *dipI::pdipICHY4* allele into SP14 strain

309

310

311 SP18 strain was obtained by transducing the *dipI::pdipICHY4* allele into SP13 strain

312

313

314 SP19 strain was obtained by transducing the *dipI::pdipICHY4* allele into SP12 strain

315

316 SP20 strain was obtained by electroporating plasmid pVmCHY*ftsN6* into CB15N  
317 cells.

318 SP21 strain was obtained by transducing the *xylR::pXVENftsB2* allele into SP15  
319 strain.

320 SP22 strain was obtained by transducing the *xylR::pXVENftsN2* allele into SP15  
321 strain.



322 SP23 strain was obtained by transducing the *xyIR::pXVENftsW2* allele into SP15  
323 strain.

324 SP24 strain was obtained by electroporating plasmid pXdipICHY5 into CB15N cells.

325 SP25 strain was obtained by electroporating plasmid pVsp2dipICHY4 into CB15N  
326 cells.

327 SP26 strain was obtained by transducing the *xyIR::pXVENftsI2* allele into SP15  
328 strain.

329

330 SP27 strain was obtained by transducing the *vanR::pVftsLCHY4* allele into SP3  
331 strain.

332 SP28 strain was obtained by transducing the *vanR::pVftsQCHY4* allele into SP3  
333 strain.

334 SP29 strain was obtained by transducing the *ftsZ::pPJM1* allele into SP15 strain.

335

#### 336 References

337 1. **Bendezu FO, Hale CA, Bernhardt TG, de Boer PA.** 2009. RodZ (YfgA) is  
338 required for proper assembly of the MreB actin cytoskeleton and cell shape  
339 in *E. coli*. EMBO J. **28**:193-204.

340

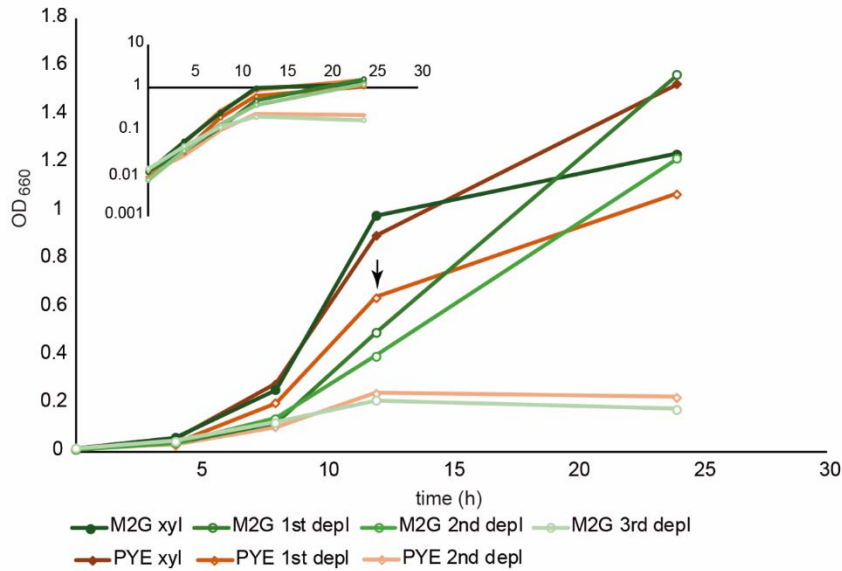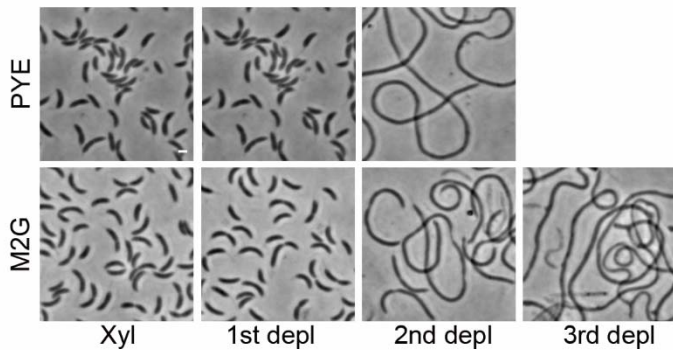

341

342 Fig.S1 Growth curve of Diplothermus depletion strain. Strain SP3 was grown ON in PYE and  
 343 or M2G medium supplemented with 0.3% xylose. Cultures with or without xylose  
 344 were inoculated with 1/100 for PYE or 1/50 for M2G of the culture volume to obtain  
 345 ON cultures that have been growing without xylose for 12 or 24 h. The culture  
 346 containing xylose was used to inoculate cultures with or without xylose and the  
 347 cultures without xylose were used to inoculate cultures without xylose. Cells  
 348 growing in M2G with xylose were washed once with fresh media before inoculating  
 349 cultures without xylose. Samples were taken from these cultures and the OD<sub>660</sub>  
 350 was measured every four hours. The same graph with logarithmic scale is shown  
 351 in the insert. Growth rate of the cultures with xylose and the first depletion are  
 352 similar, the higher terminal OD of the culture with xylose is probably due to the  
 353 additional carbon source. The majority of the increment in OD of the 2<sup>nd</sup> and 3<sup>rd</sup>  
 354 depletion cultures of PYE and M2G respectively, is due to the filamentation of the  
 355 cells. The arrow indicates the point at which the depletion culture is used to  
 356 inoculate the next depletion culture. At the 12 h timepoint, pictures of the cells were  
 357 taken and are shown at the bottom of the figure. White bar indicates 1 μm.

358

359

360

361 Table S1. Generation time and average cell length of WT and SP15 strains

362

| Strain | G M2G   | G PYE   | cell length<br>M2G | cell length<br>PYE |
|--------|---------|---------|--------------------|--------------------|
| WT     | 139 ±8  | 101 ±6  | 2.6 ±0.8           | 2.02 ±0.4          |
| SP15   | 140 ±11 | 121 ± 9 | 2.7 ±0.6           | 3.18 ±0.97         |

363

364 Generation time (G) and average cell length of CB15N (WT) and SP15 (CB15N  
365 *dipI::pdipI*CHY-4) in M2G minimal media and PYE rich medium. Generation  
366 time is in minutes and cell length in  $\mu\text{m}$ . Generation times are the average of  
367 three independent experiments and cell lengths are the representative  
368 averages of at least 500 cells from three independent measurements.

369

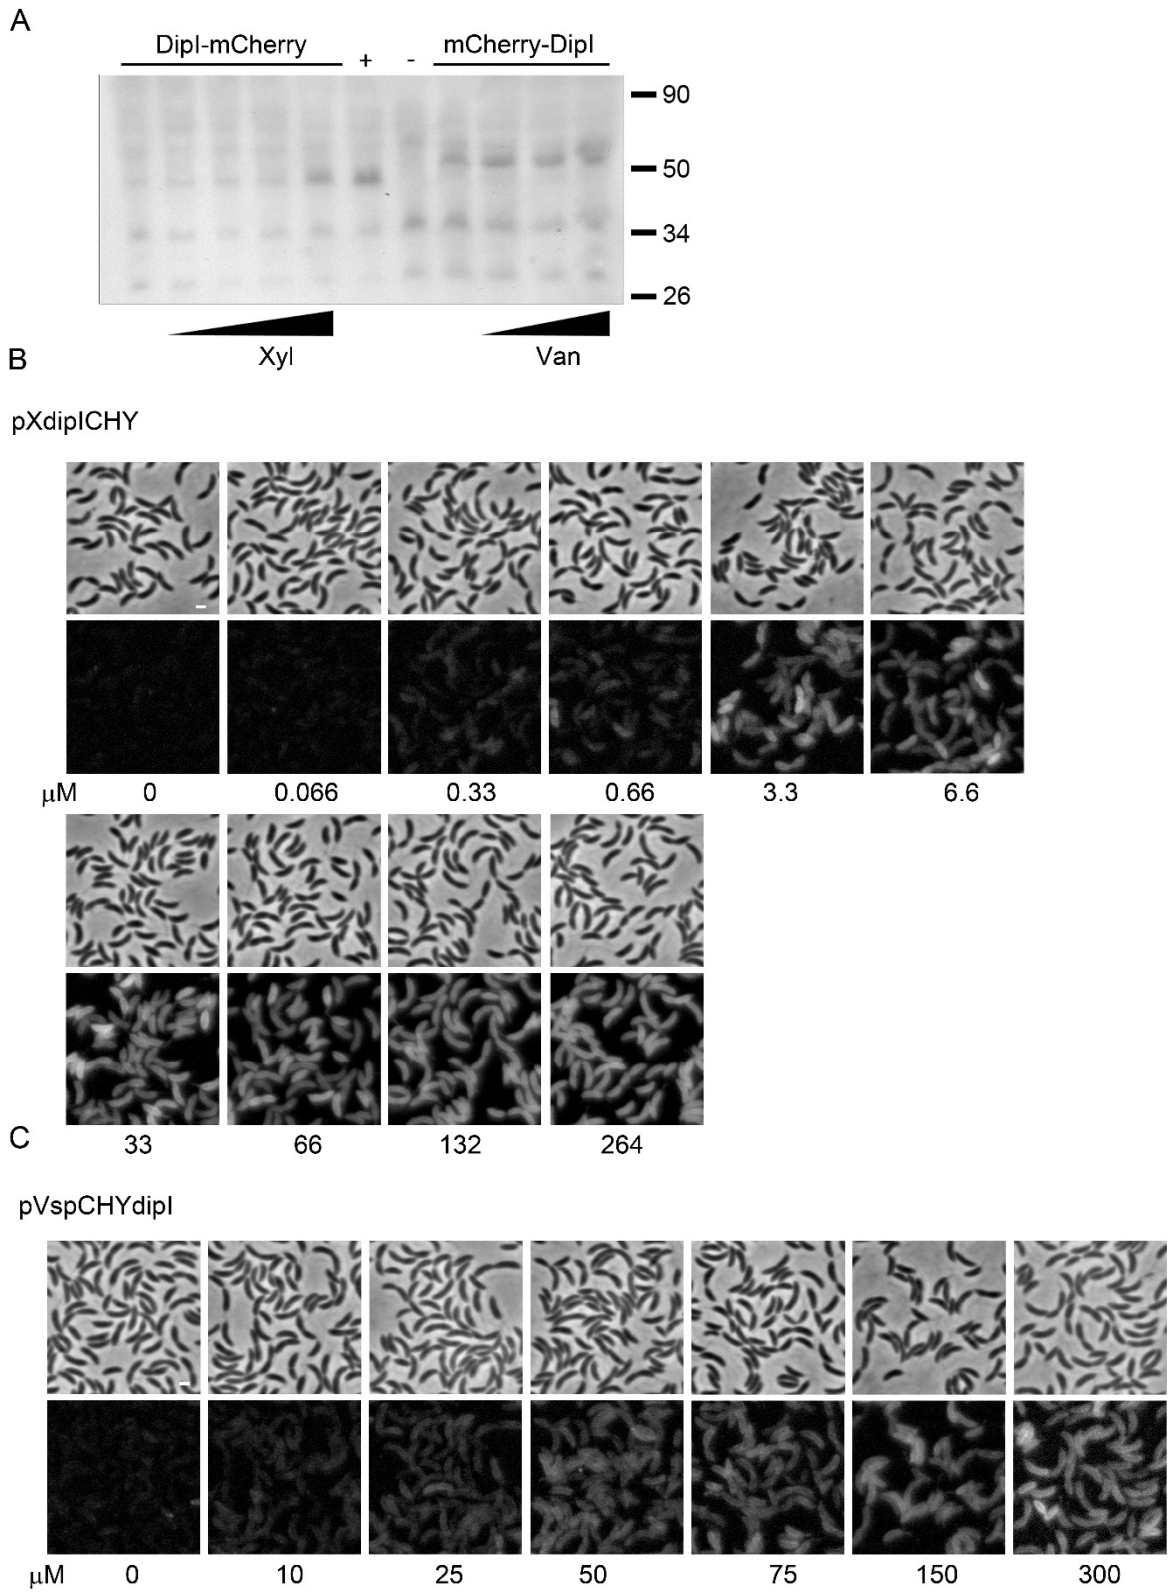

370

371

372

373

Fig. S2 Localization of the inducible N-terminal and C-terminal fusions of Dipl with mCherry. (A) Western blot of xylose inducible mCherry-Dipl and vanillic acid inducible Dipl-mCherry. Total cell extracts obtained from cultures of SP24 and SP25

374 strains induced with increasing concentrations of xylose or vanillic acid respectively  
 375 (Xylose: 0.066, 0.33, 0.66 and 3.3 $\mu$ M; Vanillic acid: 10, 25 and 50 $\mu$ M) were used to  
 376 immuno-detect the inducible N-terminal and C-terminal mCherry fusions of Dipl. (B)  
 377 Localization of xylose inducible Dipl-mCherry at increasing inducer concentrations.  
 378 Cultures of strain SP24 were induced with the indicated concentrations of xylose for  
 379 3 h before acquiring phase contrast and fluorescent images. (C) Localization of  
 380 vanillic acid inducible mCherry-Dipl at increasing inducer concentrations. Cultures  
 381 of strain SP25 were induced with the indicated concentrations of vanillic acid for 3 h  
 382 before acquiring phase contrast and fluorescent images. + (positive control, total  
 383 extract of strain SP15); - (negative control, total cell extract of CB15N). Expected  
 384 molecular weight of fusion proteins in kDa: Dipl-mCherry, 44.2; mCherry-Dipl 53.6.  
 385 Whit bars indicate 1  $\mu$ m.

386

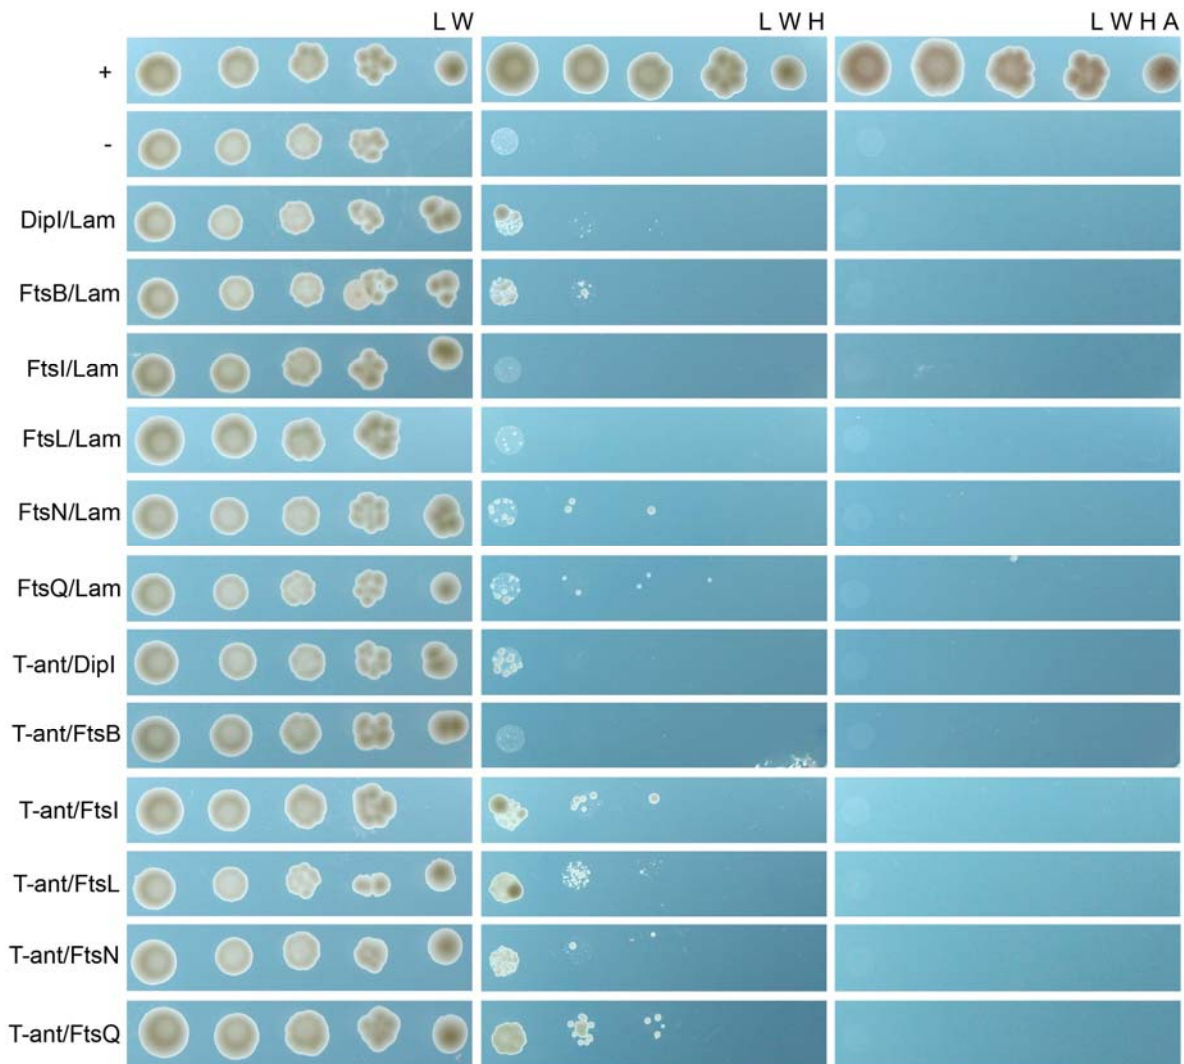

387

388 Fig. S3 Negative control interactions of division proteins with unrelated proteins.  
 389 The interaction of Dipl and the periplasmic domain of different cell division proteins  
 390 with unrelated proteins was tested in a yeast two-hybrid assay. The mature Dipl  
 391 protein and the periplasmic domains of FtsQ, L, B, I and N were fused to the  
 392 activator and DNA binding domains (AD and DBD respectively) of the Gal4 protein  
 393 and their ability to interact with the human lamin C or the SV40 large T-antigen  
 394 (expressed from the control plasmids pGBKT7-Lam and pGADT7-T respectively)  
 395 was determined by the restoration of histidine prototrophy if the interaction is  
 396 weak and of adenine if it is strong. Serial dilutions of the yeast strain carrying the  
 397 plasmids being tested were spotted in agar plates lacking leucine and tryptophan  
 398 (growth control), leu, trp and histidine (weak interaction) and trp, leu, his and  
 399 adenine (strong interaction). The missing amino acid or nucleotide base are  
 400 indicated at the top of each column (A stands for adenine). Protein fusions are  
 401 indicated in the following order DBD fusion/AD fusion. B, FtsB; L, FtsL; Q, FtsQ; I,  
 402 FtsI; N, FtsN, T-ant; SV40 large T-antigen, Lam; human lamin C.

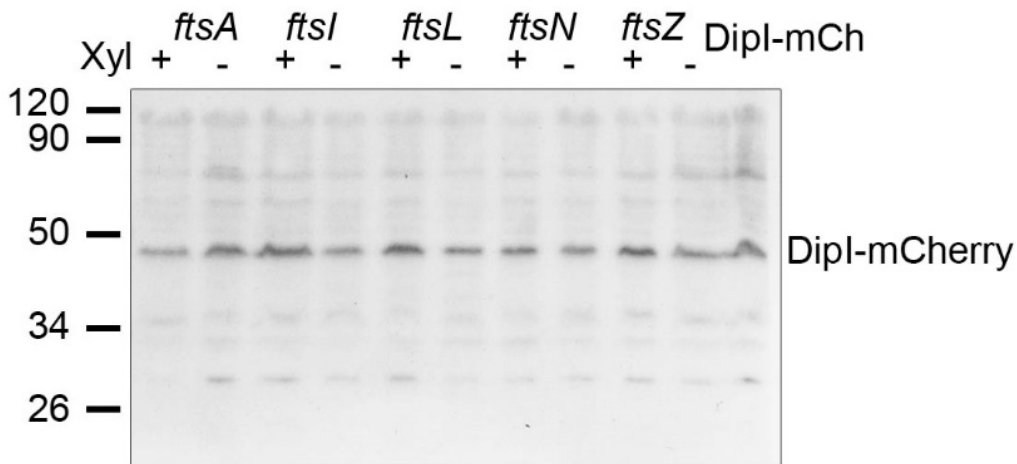

403  
 404 Fig. S4 Stability of Dipl-mCherry in cells depleted of different cell division proteins.  
 405 The stability of Dipl-mCherry in cells depleted of the division proteins FtsA, FtsI,  
 406 FtsL, FtsN and FtsZ was tested by western blot using mouse  $\alpha$ -mCherry  
 407 antibodies. The gene under control of the inducible promoter is indicated at the top  
 408 of the figure. A total cell extract of strain SP15 that expresses Dipl-mCherry was  
 409 used as positive control.

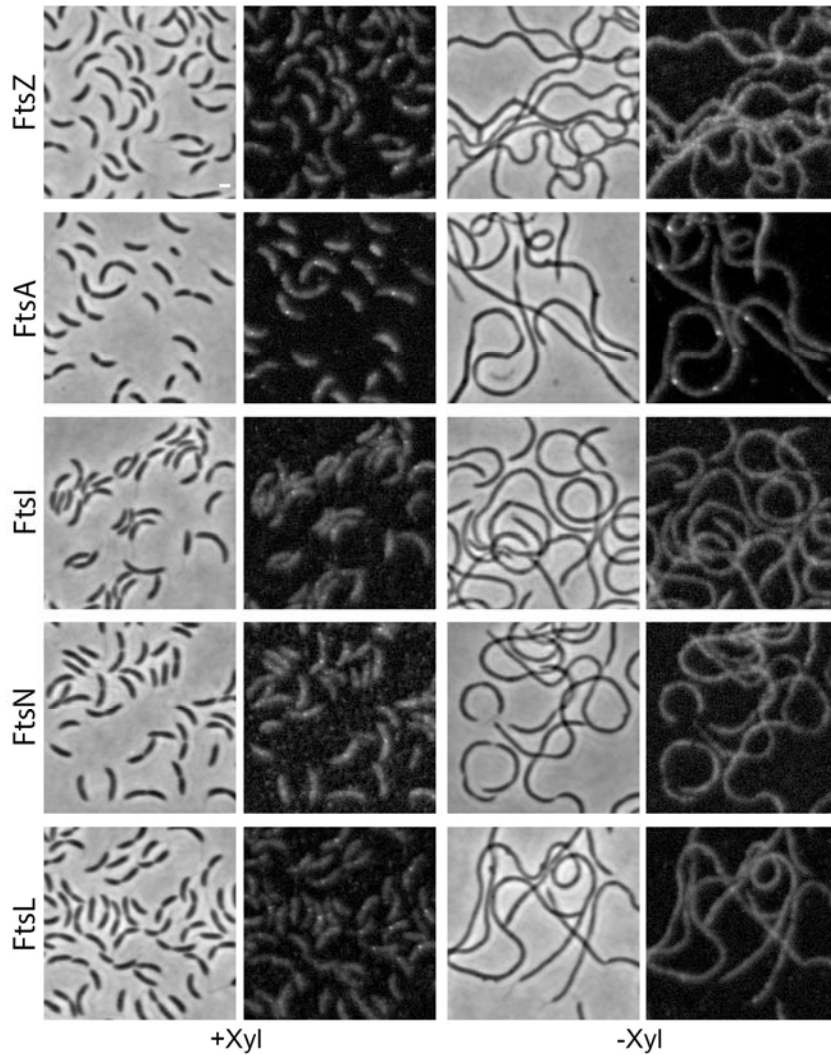

410

411 Fig. S5 The localization of Dipl-mCherry was determined in cells depleted of  
 412 different cell division proteins (indicated at the left of each row). Cells were grown  
 413 in M2G and depletion was carried out as described in Material and Methods.  
 414 Strains used from top to bottom are: SP29, SP16, SP18, SP19, SP17 Bar  
 415 indicates 1  $\mu\text{m}$ .

416
